# Supplementary material
Source: ML conference proceedings conference paper supplement (https://aclanthology.org/2021.textgraphs-1.4)
Supplement: OptionalSupplementaryMaterial [file 2021.textgraphs-1.4.OptionalSupplementaryMaterial.zip]

Archive with 3 entries (2 files):
- appendix.pdf
- __MACOSX/
- __MACOSX/._appendix.pdf
